# Supplementary figures and images for: Water-mediated and instantaneous transfer of graphene grown at 220 °C enabled by a plasma
Source: Royal Society of Chemistry journal article supplement (doi:10.1039/c5nr06365e), 2015-01-01

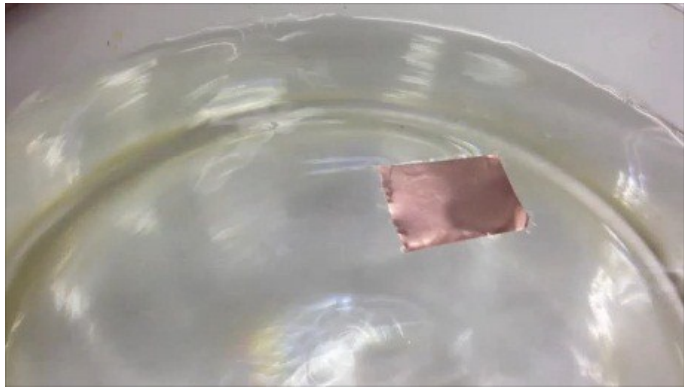

Supplement: c5nr06365e3.pdf [file c5nr06365e3.pdf]

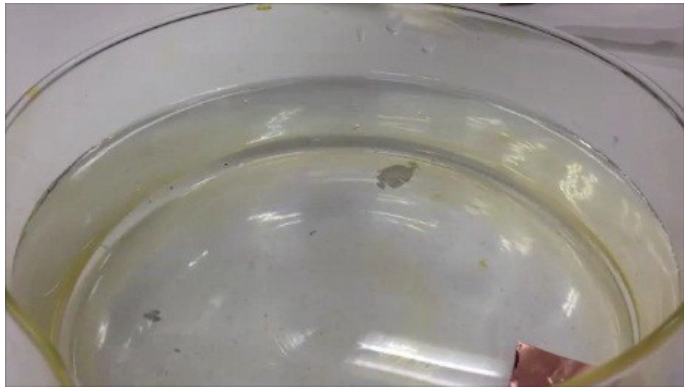

Supplement: c5nr06365e5.pdf [file c5nr06365e5.pdf]

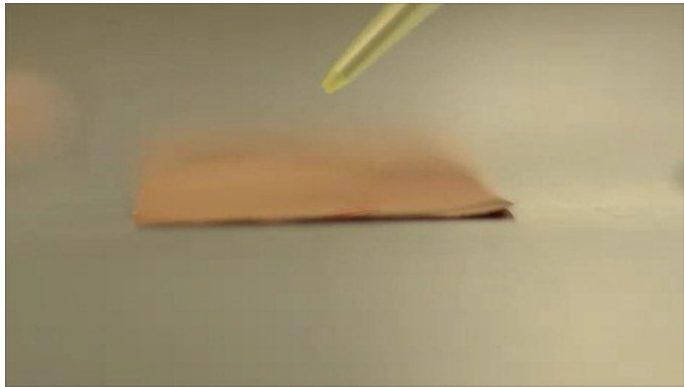

Supplement: c5nr06365e7.pdf [file c5nr06365e7.pdf]

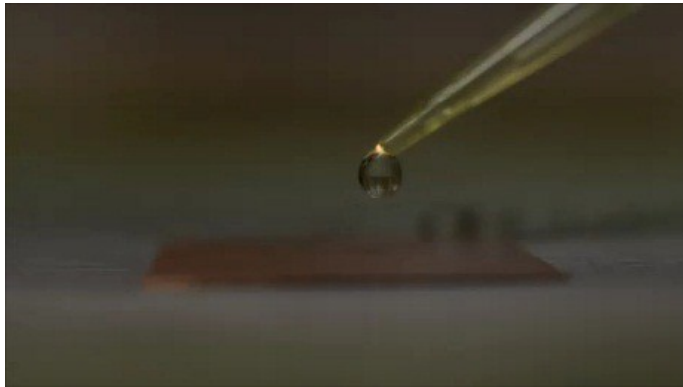

Supplement: c5nr06365e9.pdf [file c5nr06365e9.pdf]
